# Supplementary material for: A combined experimental and theoretical study of RuO2/TiO2heterostructures as a photoelectrocatalyst for hydrogen evolution
Source: Royal Society of Chemistry journal article supplement (doi:10.1039/d2dt04123e), 2023-01-01
Supplement: d2dt04123e1.pdf [file d2dt04123e1.pdf]

# A Combined Experimental and Theoretical Study of RuO<sub>2</sub>/TiO<sub>2</sub> Heterostructures as a Photoelectrocatalyst for Hydrogen Evolution

## Supporting Information

*Mohammad Kaikhosravi<sup>a</sup>, Hassan Hadadzadeh<sup>a\*</sup>, Hossein Farrokhpour<sup>a</sup>, Abdollah Salimi<sup>b</sup>,  
Hamed Mohtasham<sup>b</sup>, Annette Foelske<sup>c</sup>, and Markus Sauer<sup>c</sup>*

<sup>a</sup> Department of Chemistry, Isfahan University of Technology, Isfahan 84156-83111, Iran

<sup>b</sup> Department of Chemistry, University of Kurdistan, Sanandaj 66177-15175, Iran

<sup>c</sup> Analytical Instrumentation Center, TU Wien, Leurgasse 6, 1060 Vienna, Austria

\* **Corresponding Author:** Hassan Hadadzadeh, Email: [hadad@iut.ac.ir](mailto:hadad@iut.ac.ir)

Twenty pages (page S1-page S20) and nineteen figures (Figure S1-S19).

### Synthesis route for the preparation of $\text{Na}_2[\text{Ti}(\text{C}_2\text{O}_4)_3]$

$\text{TiCl}_4$  (1.75 g, 0.001 mol, 1 eq),  $\text{Na}_2\text{C}_2\text{O}_4$  (0.54 g, 0.004 mol, 3.7 eq), and  $\text{AgNO}_3$  (0.68 g, 0.004 mol, 4 eq) were suspended in dried acetone (10 mL) and stirred in a flask covered with a black paper for 1 h. The silver chloride ( $\text{AgCl}$ ) precipitated was centrifuged off and then anhydrous ether was added to precipitate the crude product. The obtain precipitate was recrystallized from ethanol. (Yield: ca. 70%)

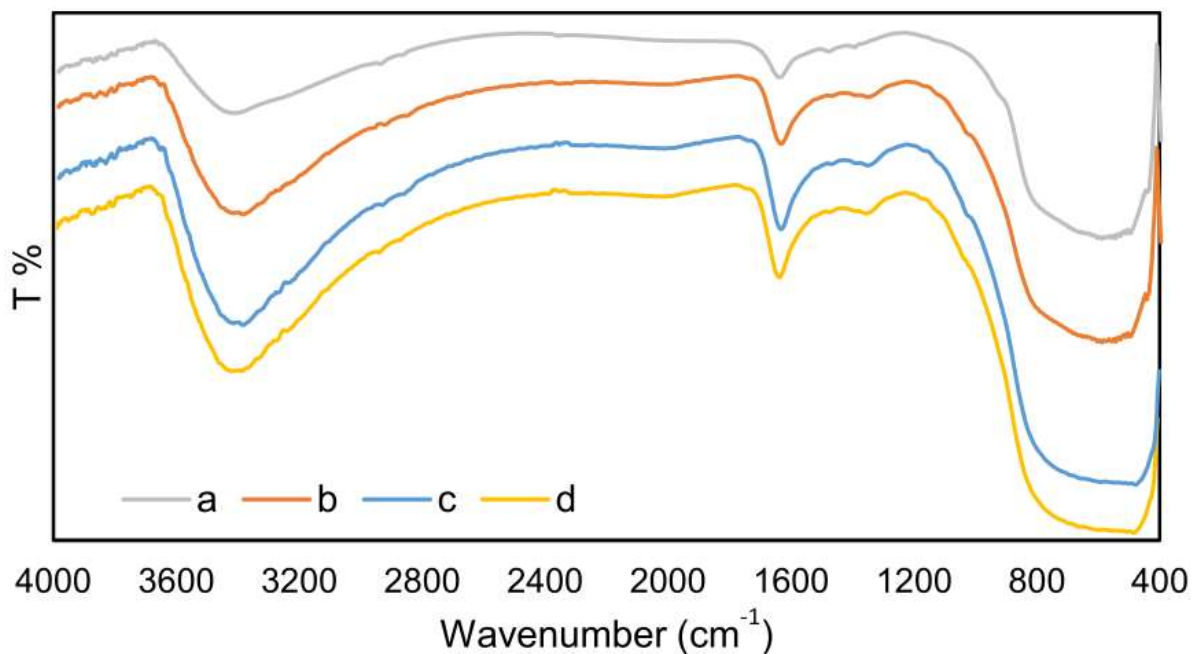

**Figure S1:** FTIR spectra of the  $\text{TiO}_2$  samples calcined at various temperatures (a: 400 °C, b: 500 °C, and c: 600 °C), and d: 8 wt %  $\text{RuO}_2/\text{TiO}_2$  heterostructure.

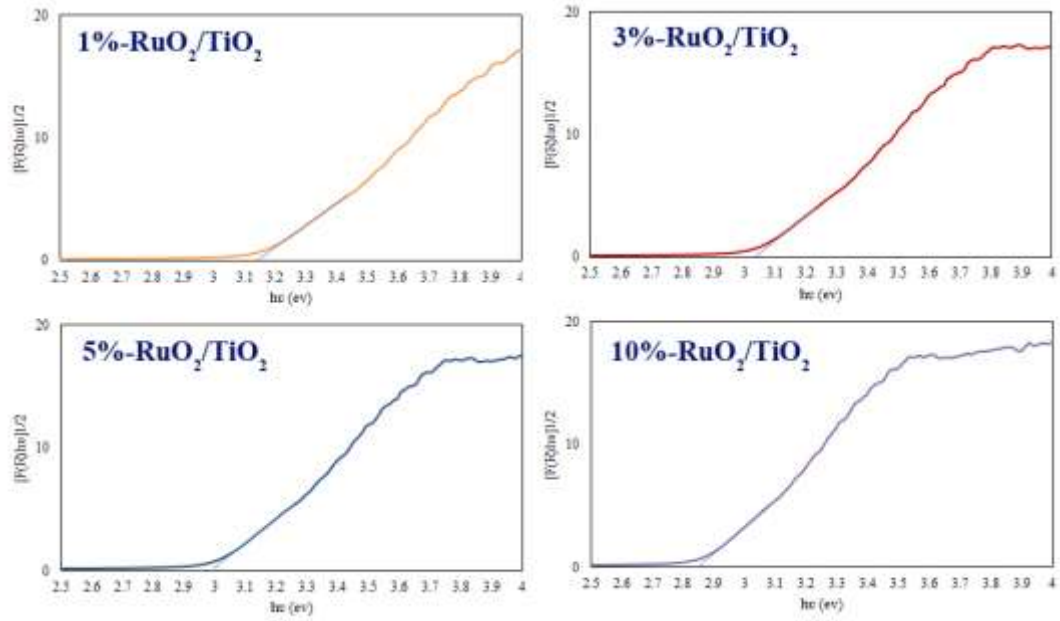

**Figure S2:** Band gaps of the RuO<sub>2</sub>/TiO<sub>2</sub> heterostructures calculated by converting the reflectance to the absorption values by the utilization of the Kubelka-Munk algorithm.

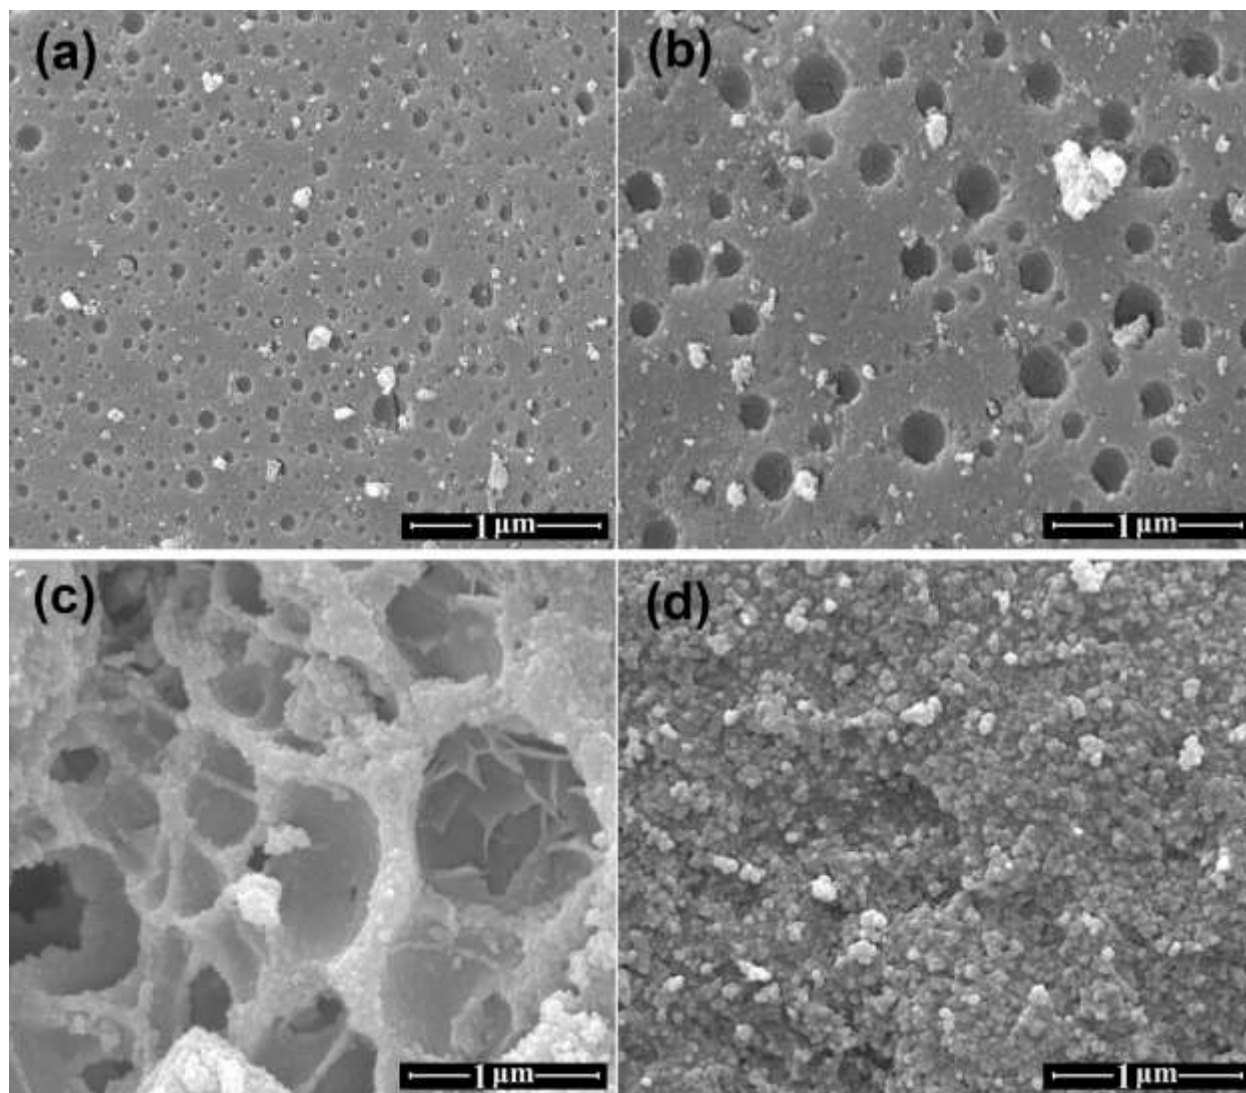

**Figure S3:** FESEM images of the mesoporous TiO<sub>2</sub> (a, b, and c prepared at 400, 500, and 600 °C, respectively), and 8 wt % RuO<sub>2</sub>/TiO<sub>2</sub> heterostructure.

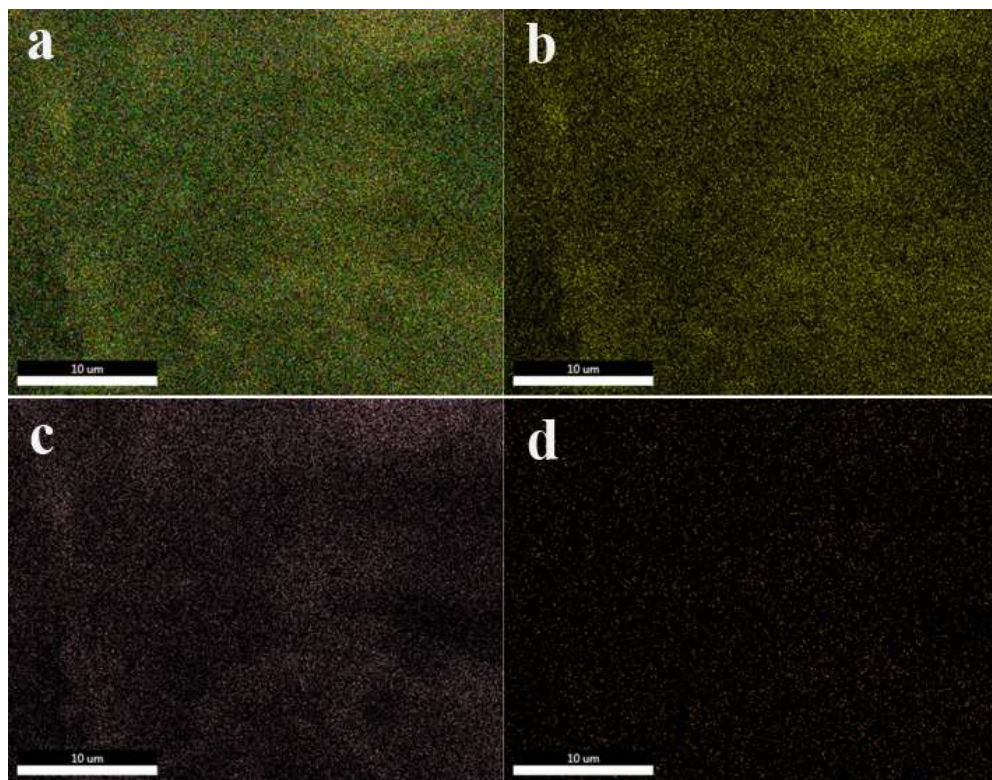

**Figure S4:** Elemental mappings of 8 wt % RuO<sub>2</sub>/TiO<sub>2</sub> heterostructure, (a) all elements, (b) titanium, (c) oxygen, and (d) ruthenium.

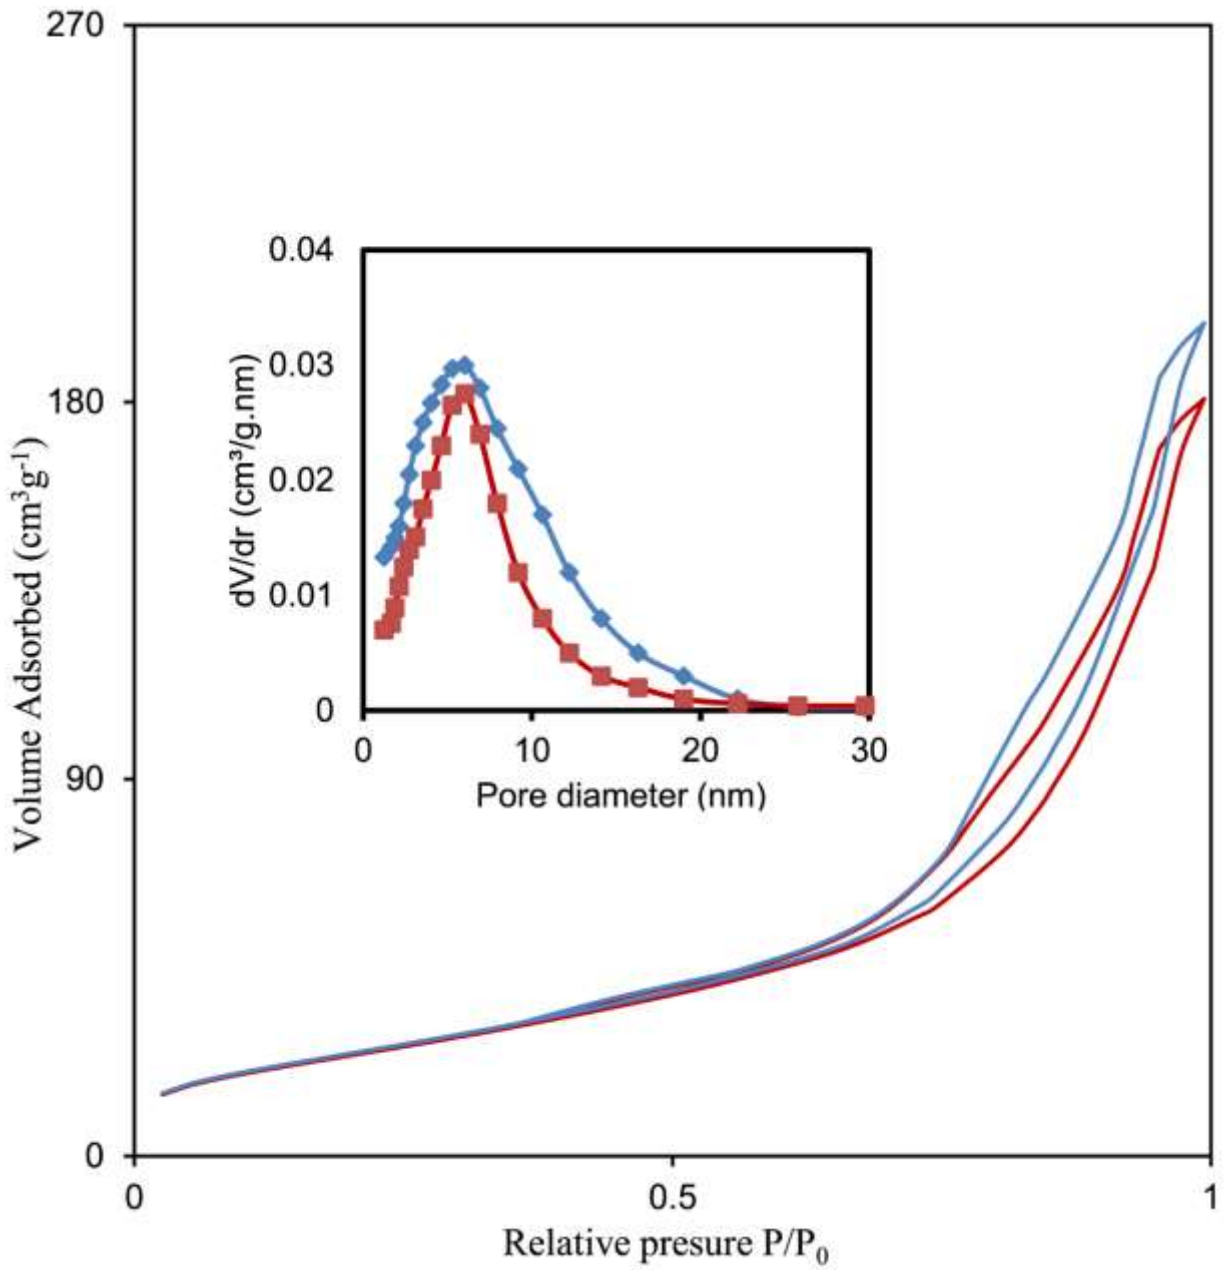

**Figure S5.** Nitrogen adsorption–desorption isotherms and the corresponding pore size distributions (inset) of the pure TiO<sub>2</sub> (red) and 8 wt % RuO<sub>2</sub>/TiO<sub>2</sub> (blue) photoelectrocatalyst.

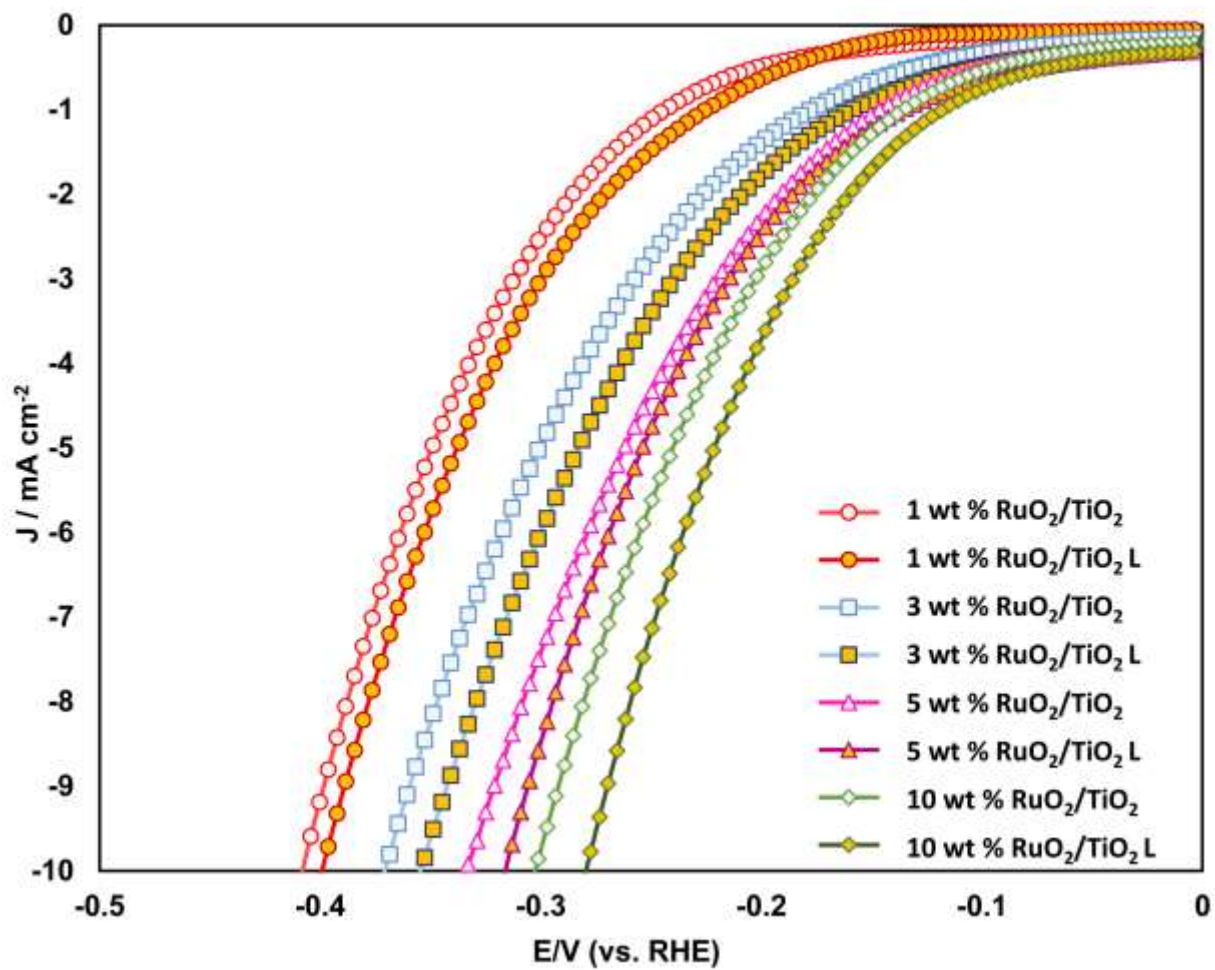

**Figure S6:** Linear sweep voltammograms of RuO<sub>2</sub>/TiO<sub>2</sub> heterostructures towards HER under dark and light conditions.

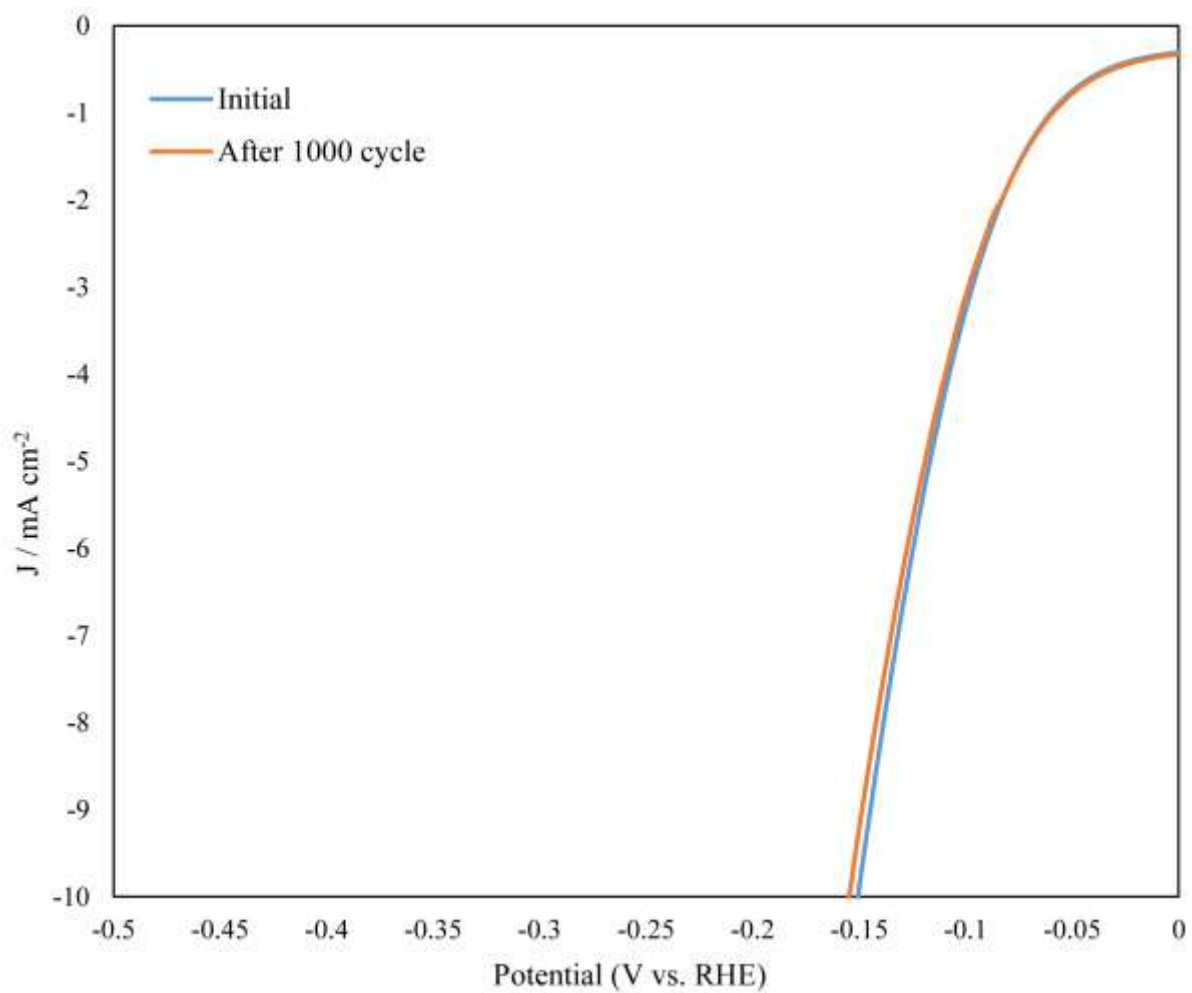

**Figure S7:** Linear sweep voltammograms of the 8 wt %  $\text{RuO}_2/\text{TiO}_2$  heterostructure towards HER before and after 1000 potential cycles.



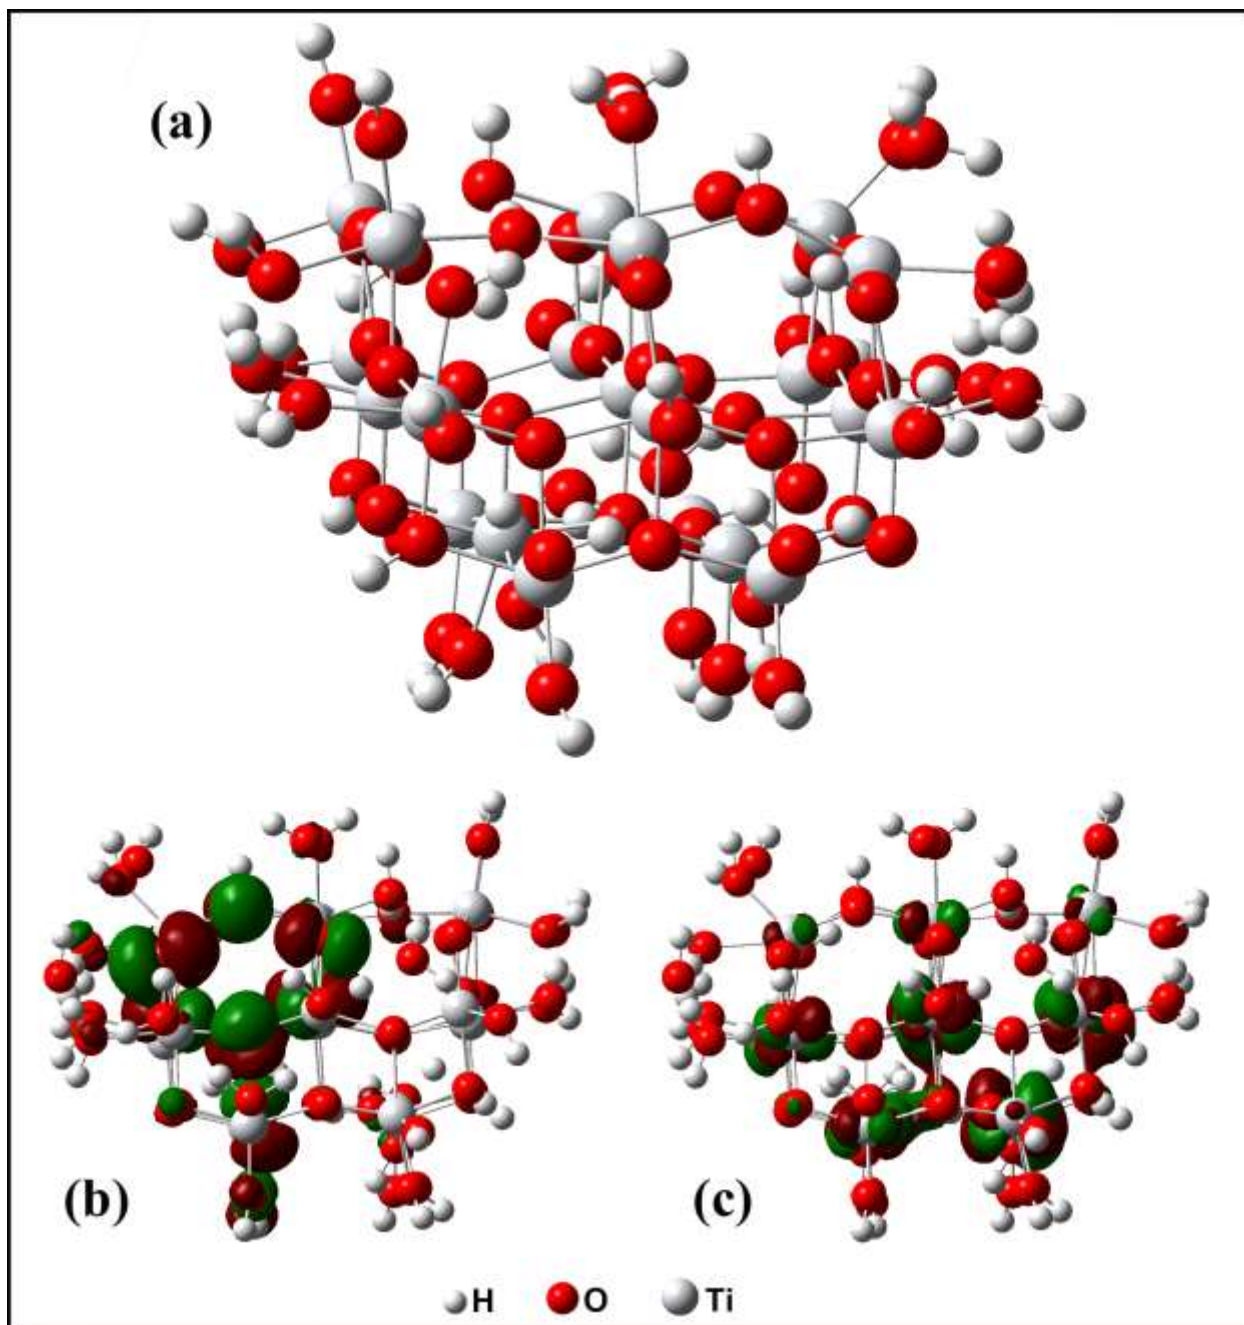

**Figure S8:** Optimized TiO<sub>2</sub> Clusters (a), HOMO (b), and LUMO (c).

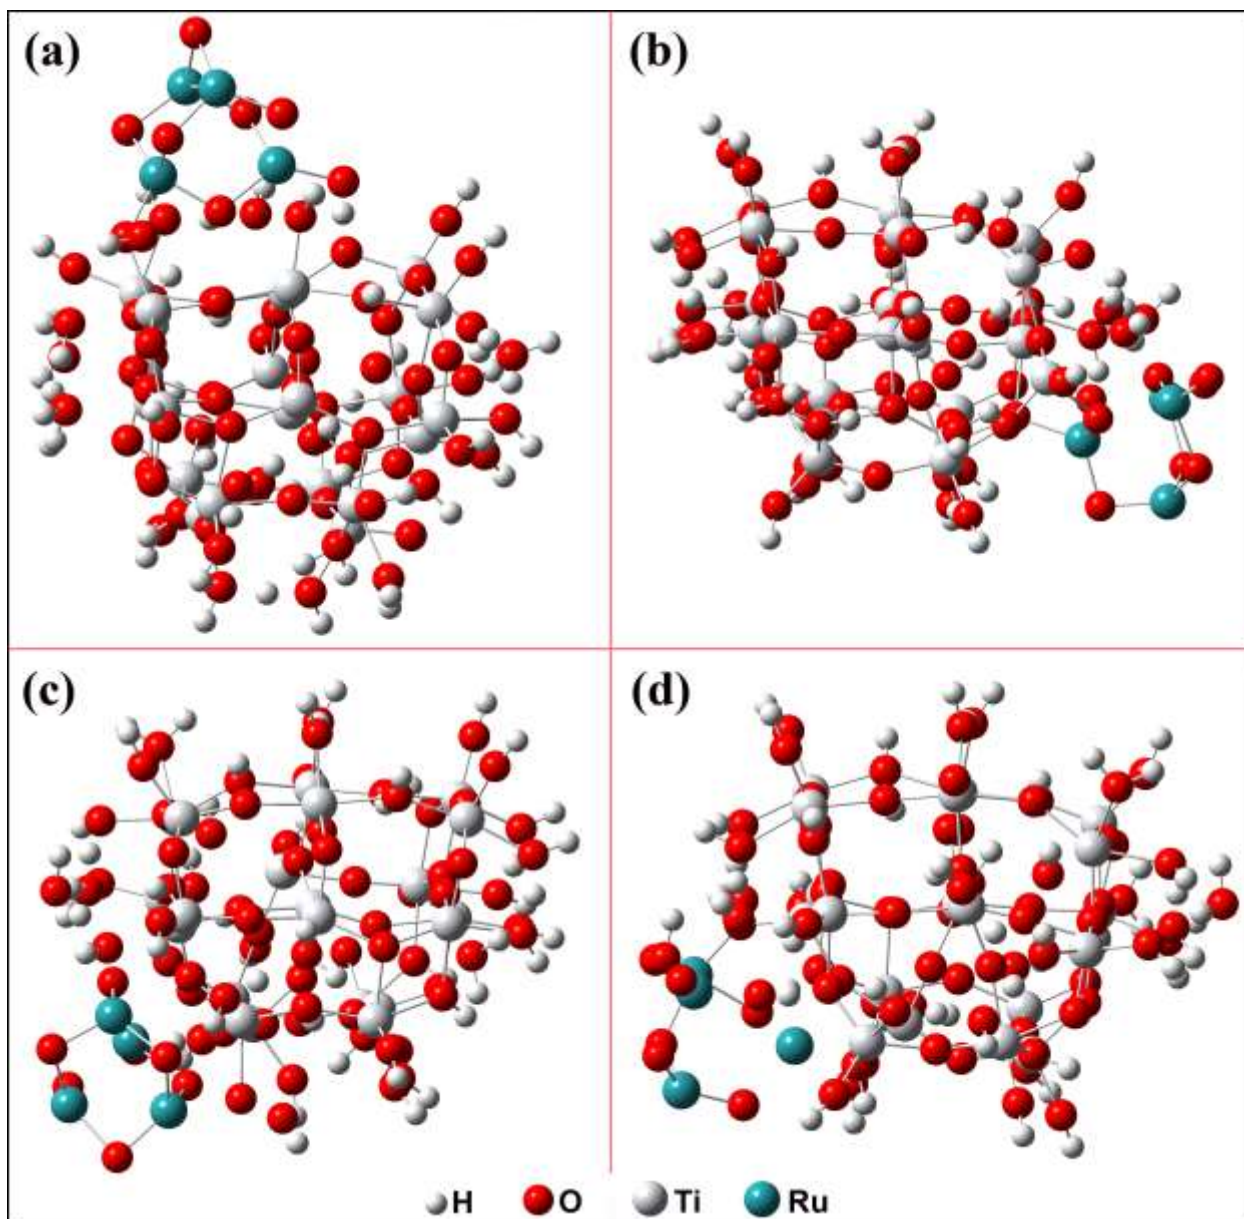

**Figure S9:** Optimized RuO<sub>2</sub>/TiO<sub>2</sub> clusters in different orientations.

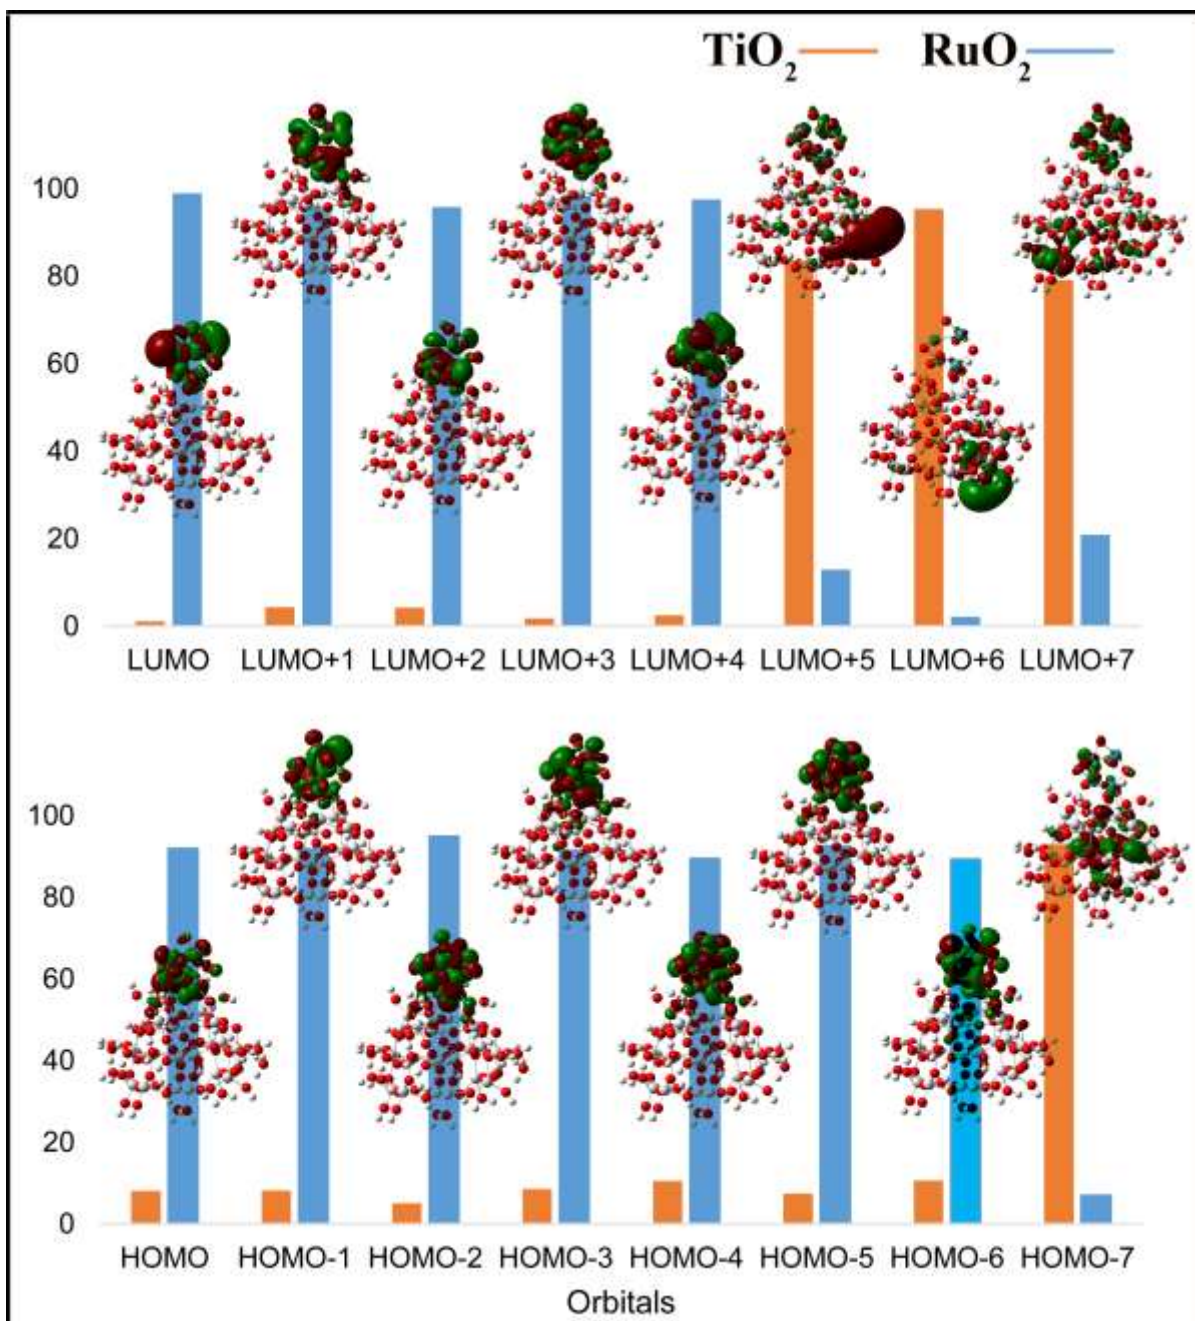

**Figure S10:** Several occupied and unoccupied molecular orbitals (HOMO-7 to LUMO+7) and fragments contributions in  $\text{RuO}_2/\text{TiO}_2$  cluster **a**.

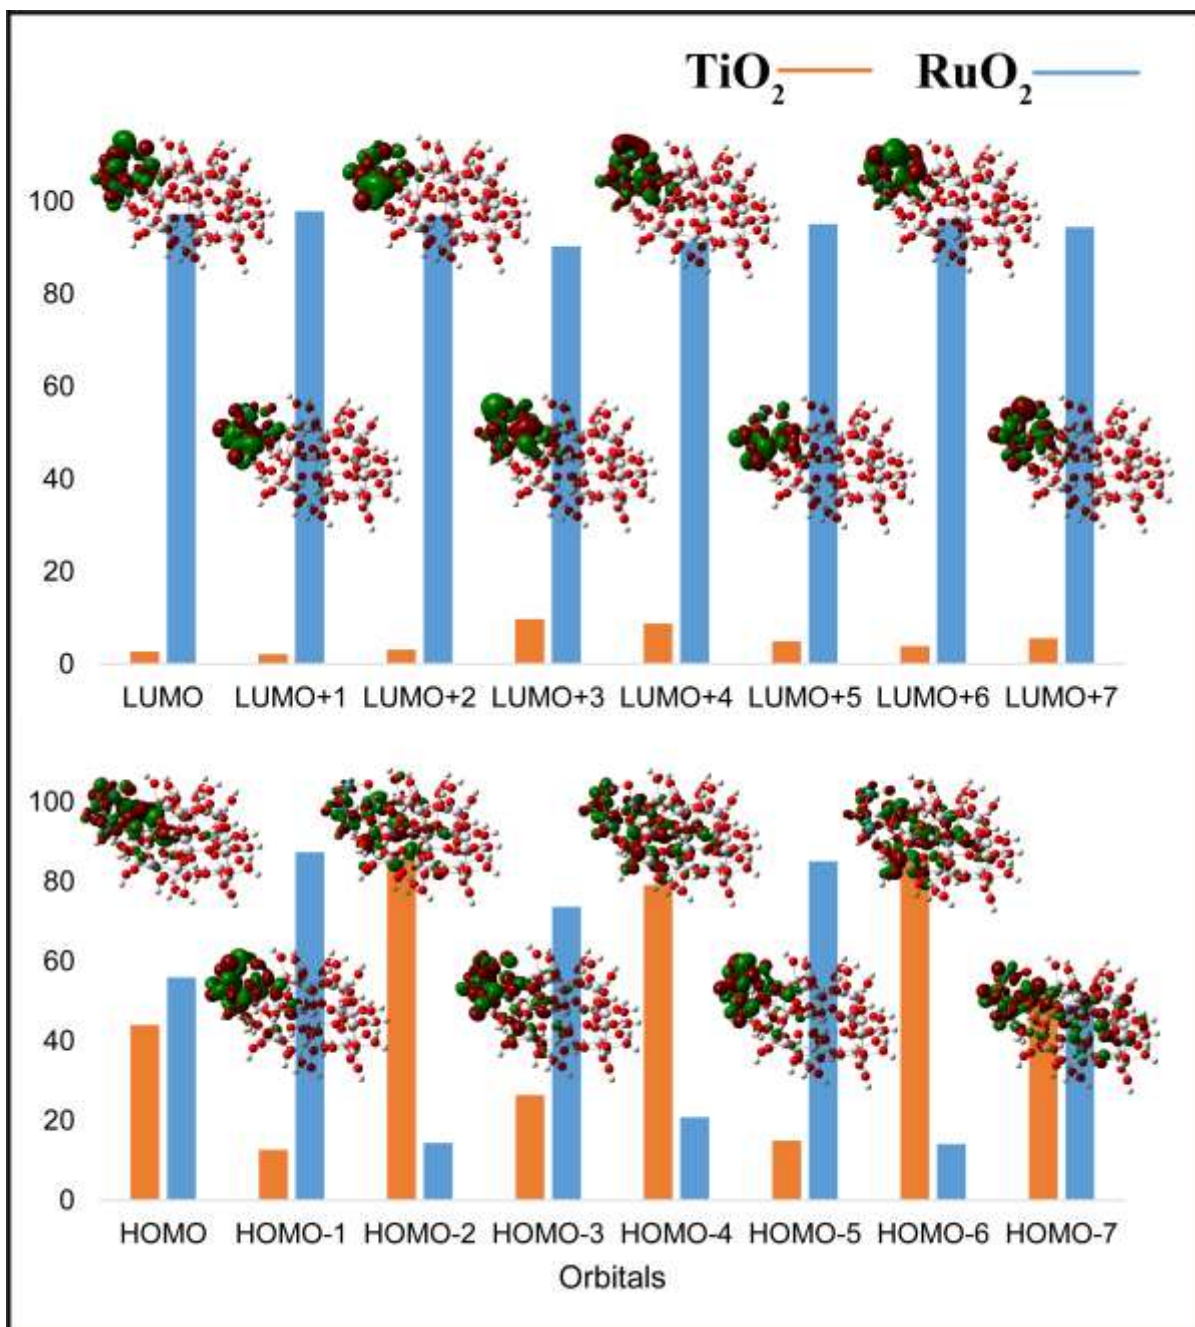

**Figure S11:** Several occupied and unoccupied molecular orbitals (HOMO-7 to LUMO+7) and fragments contributions in  $\text{RuO}_2/\text{TiO}_2$  cluster **b**

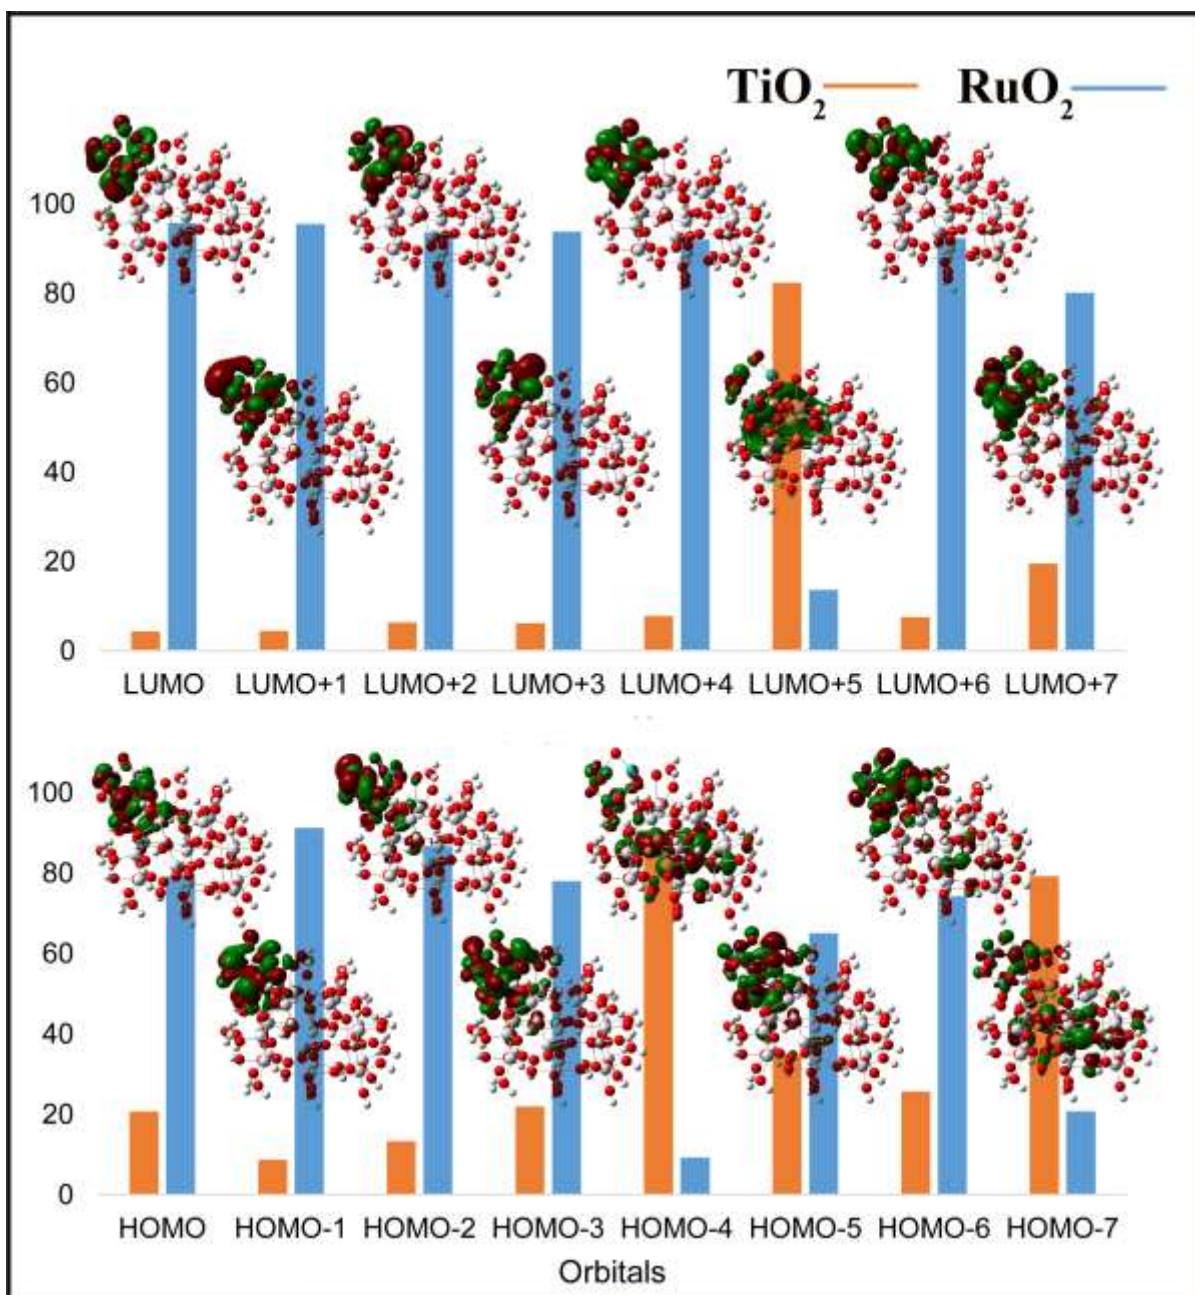

**Figure S12:** Several occupied and unoccupied molecular orbitals (HOMO-7 to LUMO+7) and fragment contributions in RuO<sub>2</sub>/TiO<sub>2</sub> cluster **c**

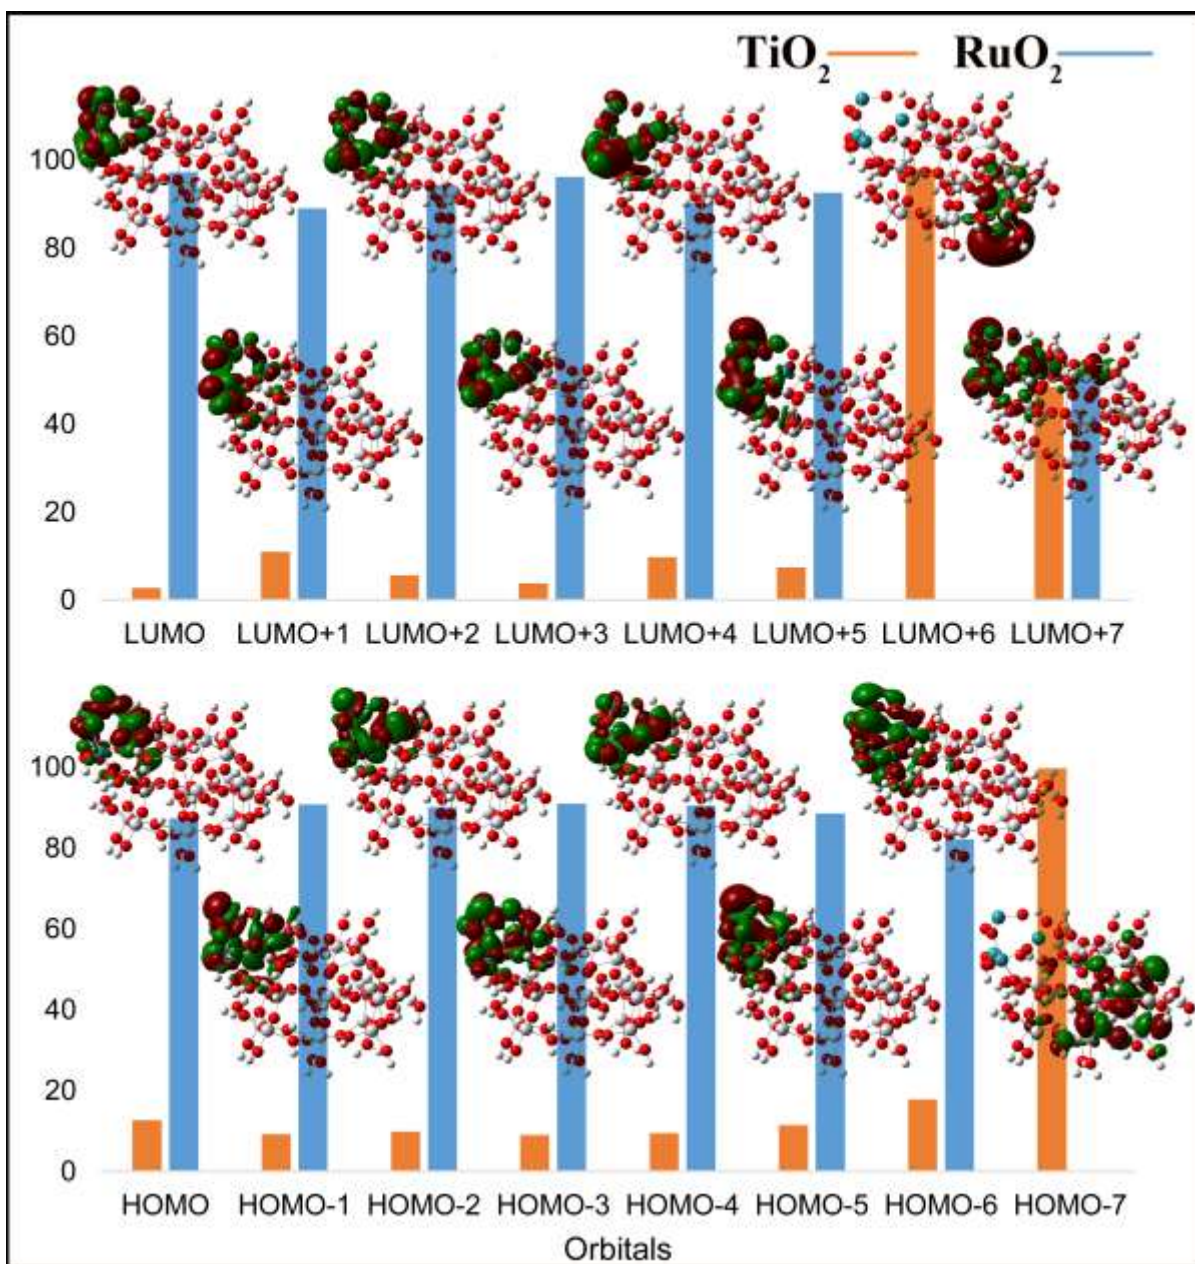

**Figure S13:** Several occupied and unoccupied molecular orbitals (HOMO-7 to LUMO+7) and fragment contributions in RuO<sub>2</sub>/TiO<sub>2</sub> cluster **d**.

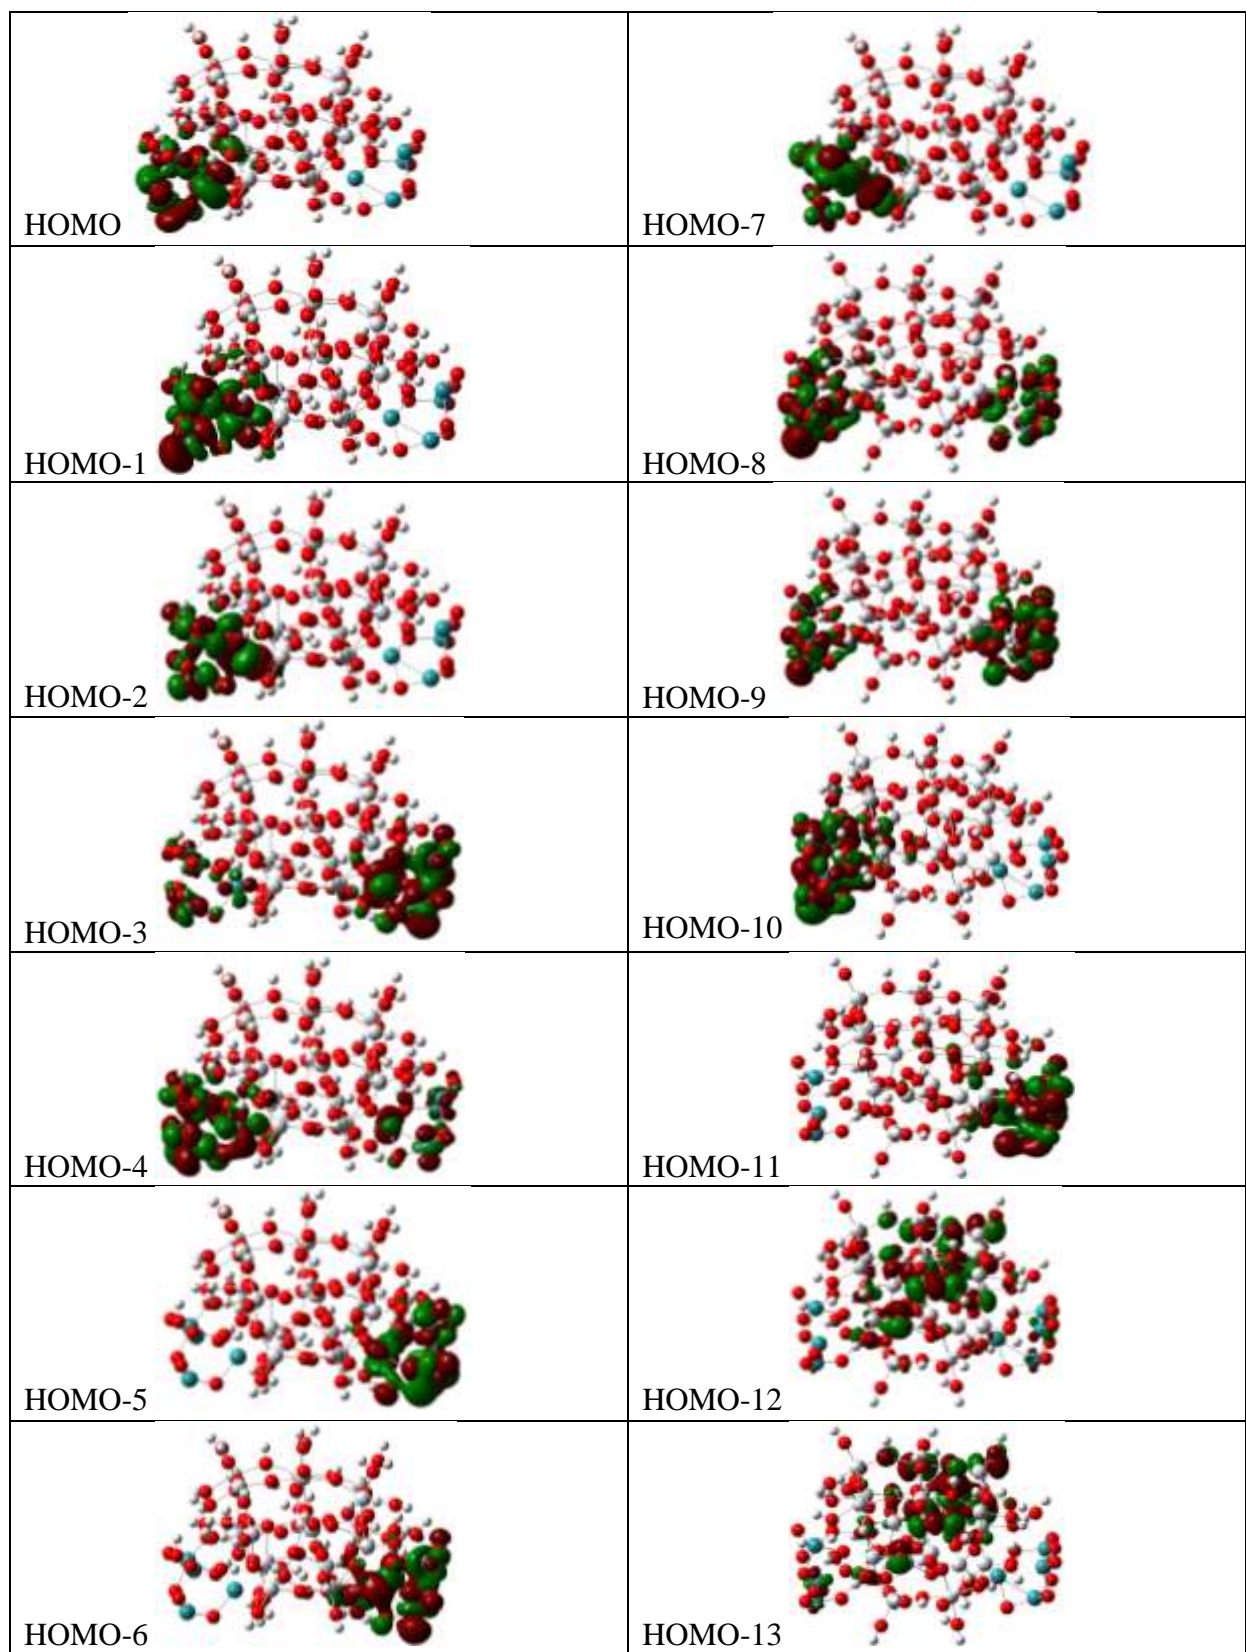

**Figure S14:** Occupied molecular orbitals (HOMO to HOMO-13) of cluster e.

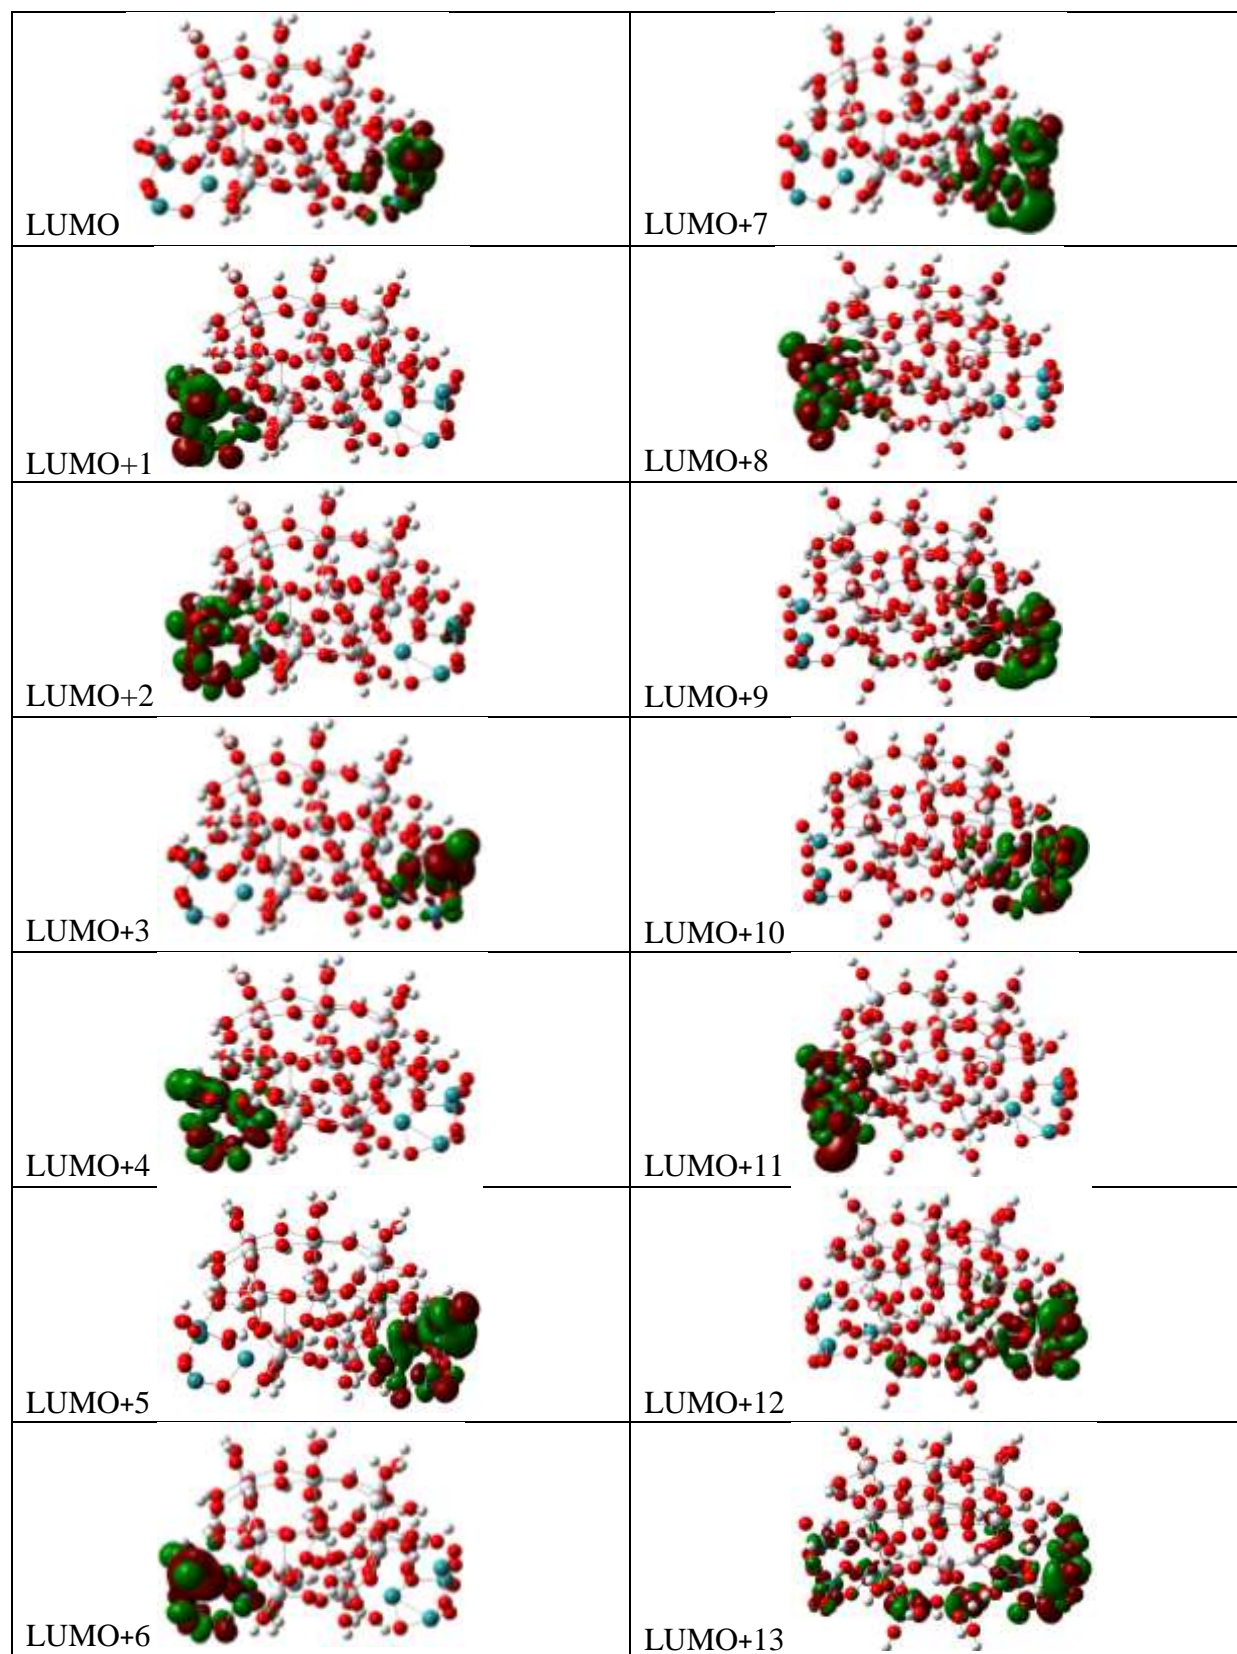

**Figure S15:** Unoccupied molecular orbitals (LUMO to LUMO+13) of cluster e.



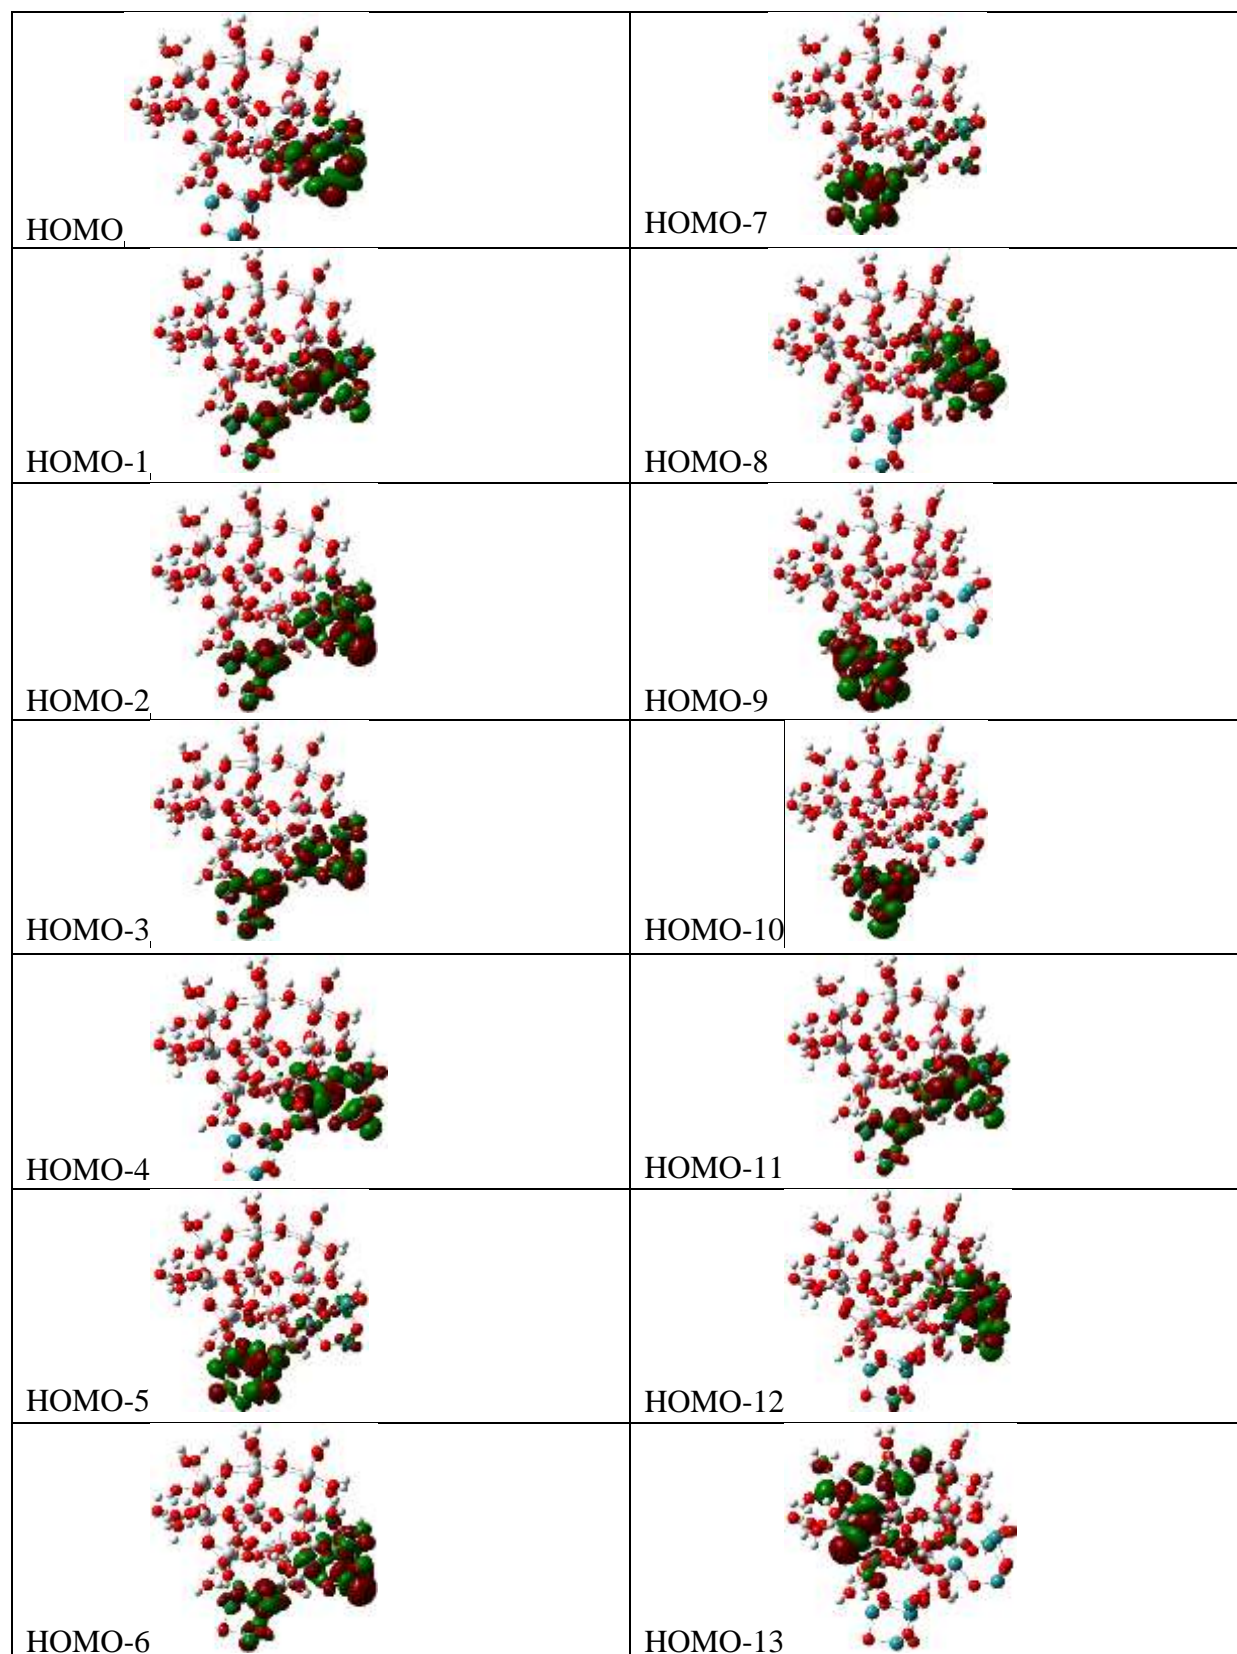

**Figure S16:** Occupied molecular orbitals (HOMO to HOMO-13) of cluster **f**.

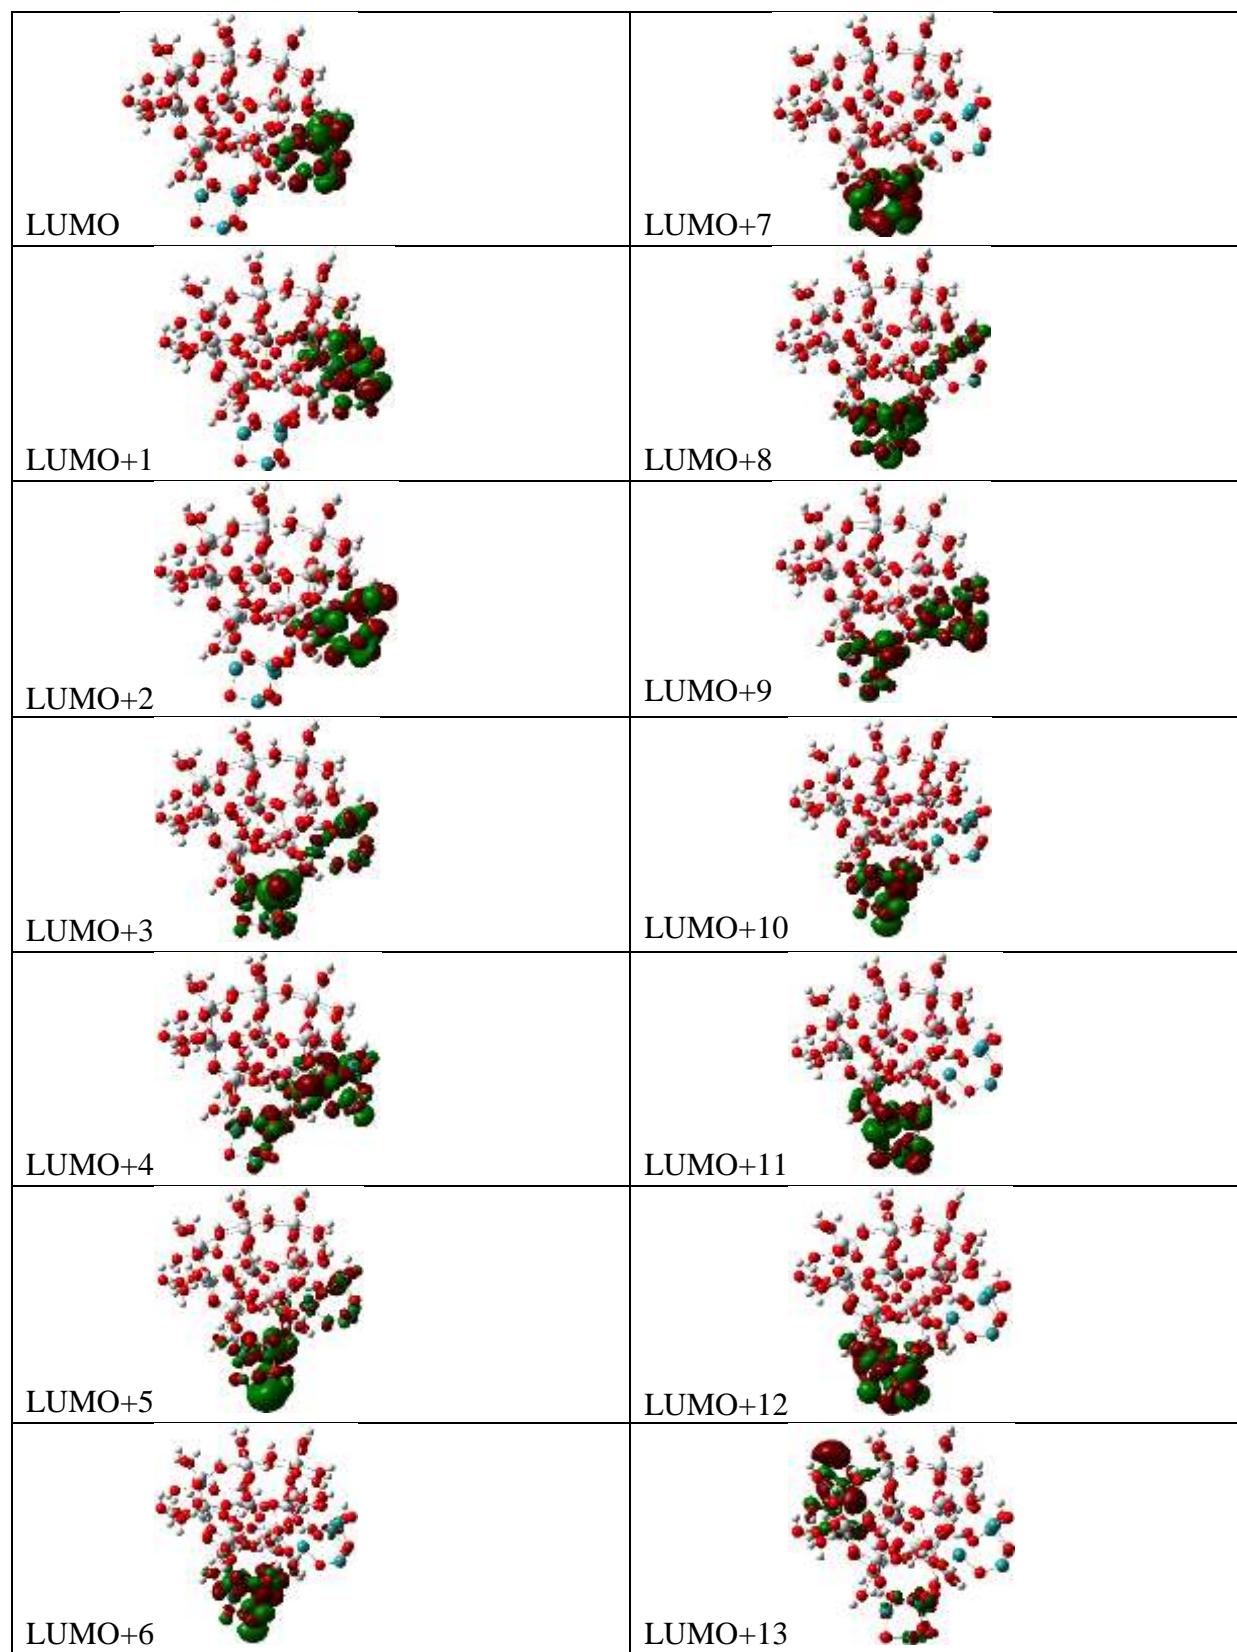

**Figure S17:** Unoccupied molecular orbitals (LUMO to LUMO+13) of cluster **f**.

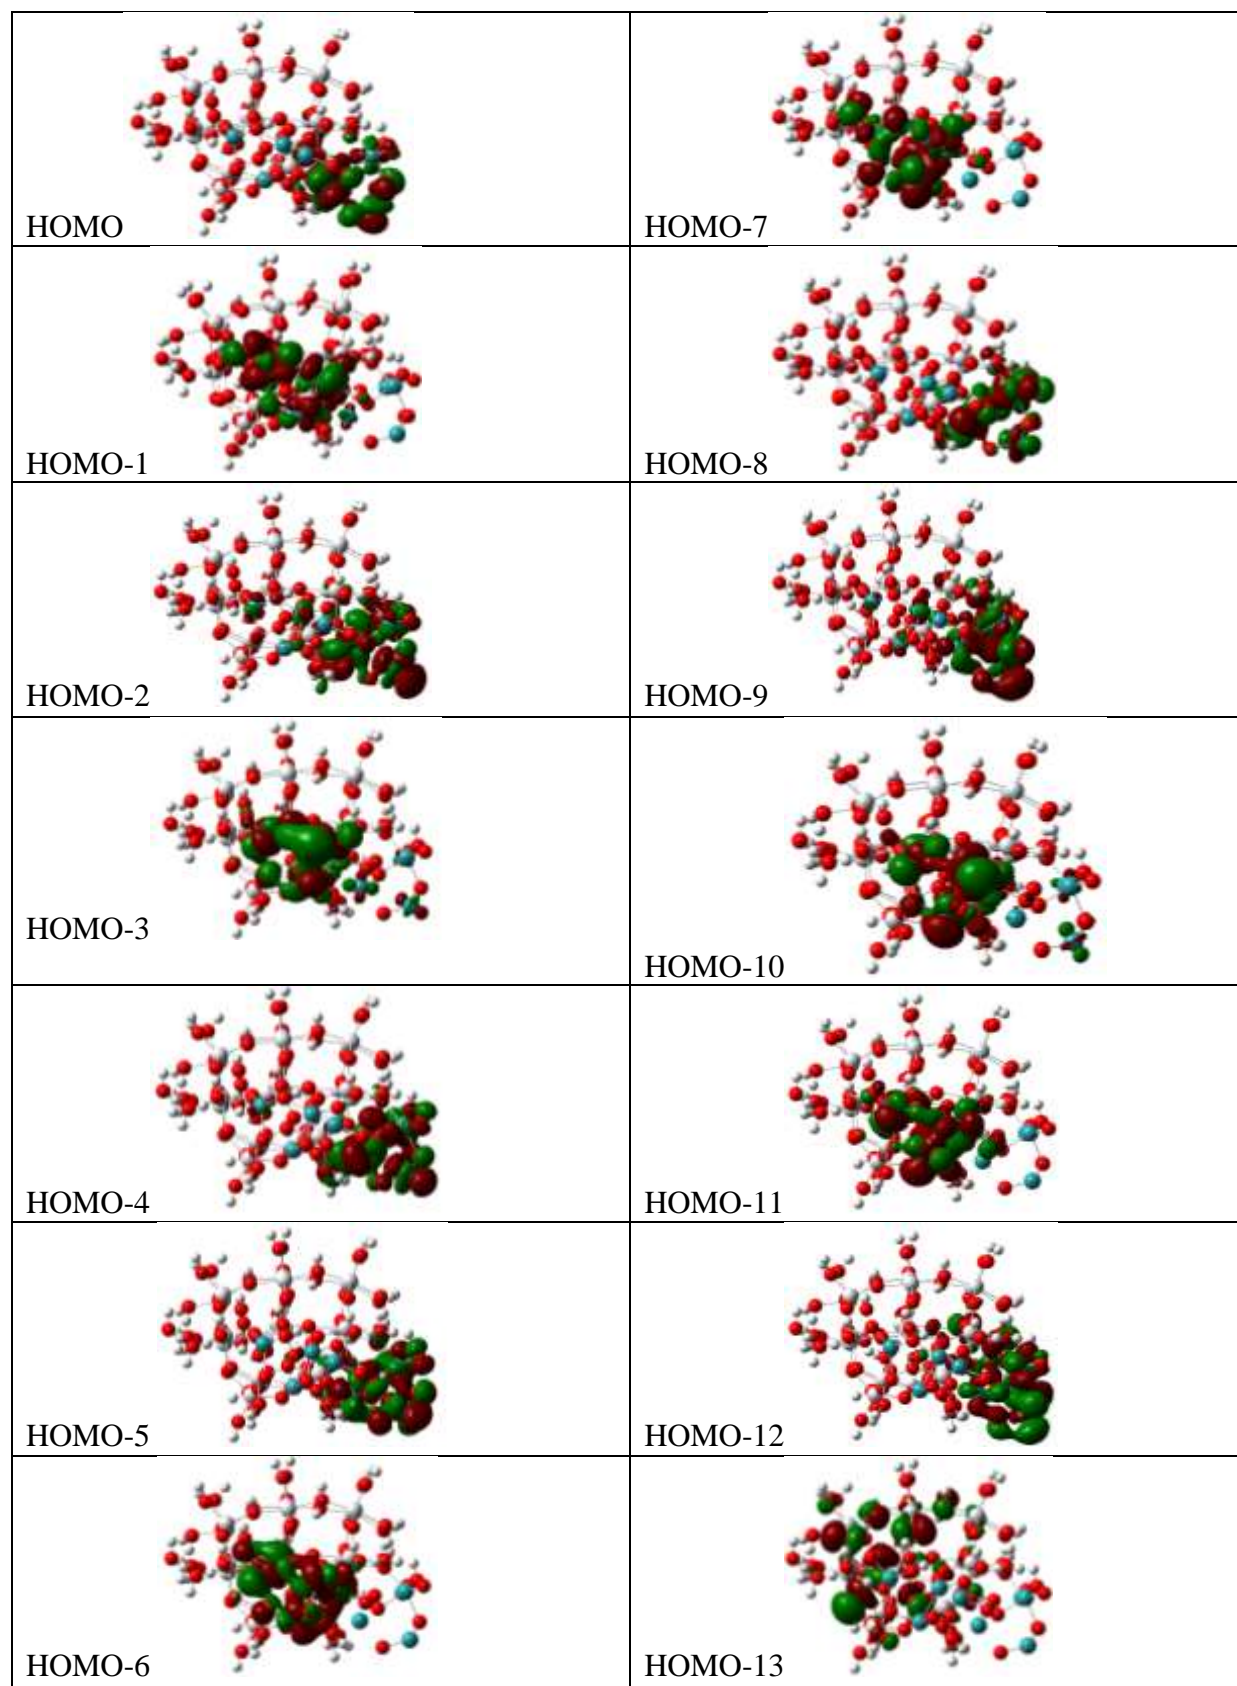

**Figure S18:** Occupied molecular orbitals (HOMO to HOMO-13) of cluster g.

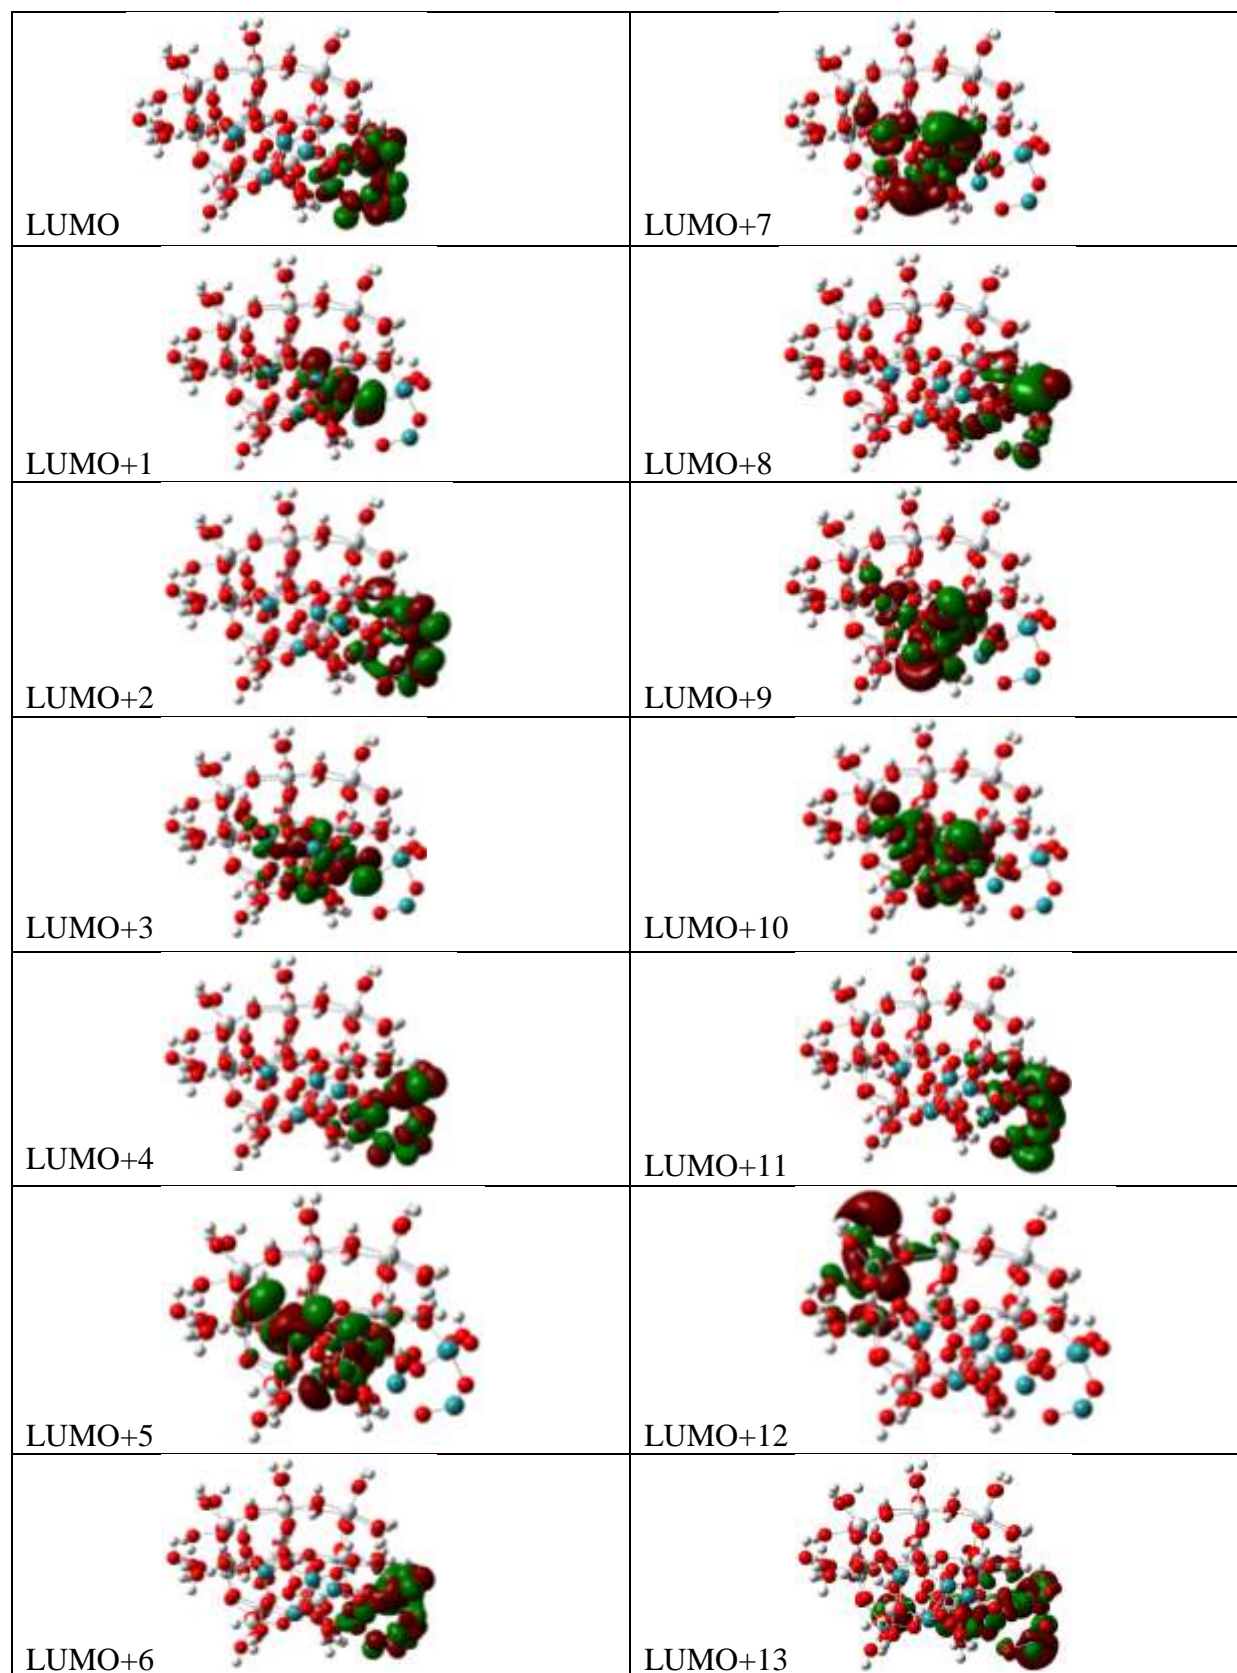

**Figure S19:** Occupied molecular orbitals (LUMO to LUMO+13) of cluster **g**.
